# Supplementary material for: Selective oxygenation of unactivated C–H bonds by dioxygenviathe autocatalytic formation of oxoiron(v) species
Source: Royal Society of Chemistry journal article supplement (doi:10.1039/d0cc03071f), 2020-01-01
Supplement: d0cc03071f1.pdf [file d0cc03071f1.pdf]

## Electronic Supplementary Information

### Selective oxygenation of unactivated C-H bonds by dioxygen via an autocatalytic formation of iron(V)-oxo species

Bittu Chandra , Puja De and Sayam Sen Gupta\*

Department of chemical Sciences, Indian Institute of Science Education and Research Kolkata, Mohanpur, West Bengal 741246, India. Email: sayam.sengupta@iiserkol.ac.in

| Table of Contents                                                                                                                                       | Page No. |
|---------------------------------------------------------------------------------------------------------------------------------------------------------|----------|
| Experimental section.....                                                                                                                               | S2       |
| Table S1. Oxygenation reaction by different molecular iron complexes by dioxygen.....                                                                   | S3       |
| Figure S1. TON vs time plot for the oxygenation of ethylbenzene (0.1 M) with <b>1a</b> (0.1 mM) in acetone.....                                         | S4       |
| Figure S2. ESI-Mass of [(bTAML)Fe <sup>V</sup> (O)] <sup>-</sup> formed from <b>1a</b> in presence of substrate in aerated acetone.....                 | S4       |
| Figure S3. UV-Vis spectra for the formation of [(NO <sub>2</sub> -bTAML)Fe <sup>V</sup> (O)] <sup>-</sup> from <b>1c</b> and adamantane in acetone..... | S5       |
| Figure S4a. Change in induction period for the formation of Fe <sup>V</sup> (O) for purified and old substrate.....                                     | S5       |
| Figure S4b. Change in induction period for the formation of Fe <sup>V</sup> (O) for purified and old acetone solvent.....                               | S5       |
| Figure S5. Change in induction period for the formation of Fe <sup>V</sup> (O) by addition of Fe <sup>V</sup> (O) .....                                 | S6       |
| Figure S6. Change in induction period for the formation of Fe <sup>V</sup> (O) by addition of substrate (cumene) .....                                  | S6       |
| Figure S7. Change in induction period for the formation of Fe <sup>V</sup> (O) by addition of cumylhydroperoxide .....                                  | S7       |
| Figure S8. Formation of Fe <sup>V</sup> (O) from <b>1a</b> using cumylhydroperoxide and t-butylhydroperoxide .....                                      | S7       |
| Figure S9. Formation of Fe <sup>V</sup> (O) from dimer ( <b>2</b> ) in aerated acetone solvent.....                                                     | S8       |
| Figure S10. UV-Vis time trace at 613 nm in the reaction of <b>1a</b> with diphenylmethane and ethylbenzene.....                                         | S8       |
| Figure S11. ESI-Mass of [(bTAML)Fe <sup>IV</sup> -OR] <sup>-</sup> (where RH = diphenylmethane) .....                                                   | S9       |
| Figure S12-S19. GC-MS traces for the oxygenation reaction of different substrates .....                                                                 | S10-S13  |
| References.....                                                                                                                                         | S14      |

## Experimental Section

### Materials.

All reagents were obtained commercially and used without further purification unless otherwise noted.  $[\text{Et}_4\text{N}]_2[(\text{bTAML})\text{Fe}^{\text{III}}\text{-Cl}]$  (**1a**),  $[\text{PPh}_4][(\text{bTAML})\text{Fe}^{\text{III}}\text{-OH}_2]$  (**1b**) and  $[\text{Et}_4\text{N}]_2[(\text{NO}_2\text{-bTAML})\text{Fe}^{\text{III}}\text{-Cl}]$  (**1c**) (bTAML = biuret-modified tetraamidomacrocyclic ligands) was synthesized by our previously reported method.<sup>1,2</sup> Acetone (HPLC grade, Aldrich) was rigorously purified as mention in literature.<sup>3</sup> All the substrates were purchased from Aldrich and TCI and were passed through activated neutral alumina, silica and  $\text{MgSO}_4$  and distilled prior to use.

### General Instrumentation.

UV-vis spectral studies were carried out using Agilent diode array Cary 8454 spectrophotometer attached with an electrically controlled thermostat. GC-MS was performed on a Thermo Scientific ISQ QD Mass Spectrometer attached with Thermo Scientific TRACE 1300 gas chromatograph using an HP-5ms capillary column ( $30\text{ m} \times 0.25\text{ mm} \times 0.25\text{ }\mu\text{m}$ , J&W Scientific) with helium as the carrier gas. ESI-Mass was performed in a Thermo Scientific QExactive Orbitrap analyzer using an electrospray ionization source connected with a C18 column ( $150\text{ m} \times 4.6\text{ mm} \times 8.0\text{ }\mu\text{m}$ ).

### Catalytic reaction of 1a and 1c with substrates in air saturated acetone at room temperature.

All the catalytic reactions were performed in an optimized reaction condition where the iron complexe,  $[(\text{bTAML})\text{Fe}^{\text{III}}\text{-Cl}]^{2-}/[(\text{NO}_2\text{-bTAML})\text{Fe}^{\text{III}}\text{-Cl}]^{2-}$  (**1a/1c**) (0.1 mM) was dissolved in aerated acetone solvent and 0.10 M of alkane substrate was added to the solution. The reaction mixture was kept for 20h at ambient pressure and temperature. After the reaction, the solution was passed through an alumina plug and diluted to 20 times before injection to GCMS. Bromobenzene was used as internal standard for all these reactions. The products were identified and quantified using GCMS.

**Table S1. Iron complexes of different ligands employed for substrate oxygenation via O<sub>2</sub> activation vs autocatalytic oxidation**

| Catalysts                                                                                                                                              | Oxidant        | Active species                  | Proposed Mechanism        | Substrates                                     | Ref.      |
|--------------------------------------------------------------------------------------------------------------------------------------------------------|----------------|---------------------------------|---------------------------|------------------------------------------------|-----------|
| [Fe <sup>II</sup> (H <sub>2</sub> buea)] <sup>2-</sup>                                                                                                 | O <sub>2</sub> | Fe <sup>III</sup> (O)           | O <sub>2</sub> activation | No report                                      | 4         |
| [Fe <sup>II</sup> (TMC)] <sup>2+</sup>                                                                                                                 | O <sub>2</sub> | Fe <sup>IV</sup> (O)            | O <sub>2</sub> activation | Ph <sub>3</sub> P, Benzyl alcohol, cyclohexene | 5         |
| [Fe <sup>II</sup> (Bn-TPEN)] <sup>2+</sup>                                                                                                             | O <sub>2</sub> | Fe <sup>IV</sup> (O)            | O <sub>2</sub> activation | No report                                      | 6         |
| [Fe <sup>II</sup> (N <sub>4</sub> Py)] <sup>2+</sup>                                                                                                   | O <sub>2</sub> | Fe <sup>IV</sup> (O)            | O <sub>2</sub> activation | No report                                      | 6         |
| [Fe <sup>II</sup> (bispidine)]                                                                                                                         | O <sub>2</sub> | Fe <sup>IV</sup> (O)            | Autocatalyzed             | cis-dimethylcyclohexane                        | 7         |
| [Ph <sub>4</sub> P][Fe <sup>III</sup> (OH <sub>2</sub> )(TAML)]                                                                                        | O <sub>2</sub> | Fe <sub>2</sub> <sup>IV</sup> O | O <sub>2</sub> activation | Ph <sub>3</sub> P, Benzyl alcohol              | 8         |
| Na[Fe <sup>III</sup> (TAML)]                                                                                                                           | O <sub>2</sub> | Fe <sup>V</sup> (O)             | Autocatalyzed             | cyclohexene                                    | 9         |
| [Ph <sub>4</sub> P][Fe <sup>III</sup> (OH <sub>2</sub> )(bTAML)]                                                                                       | O <sub>2</sub> | Fe <sub>2</sub> <sup>IV</sup> O | O <sub>2</sub> activation | Alkenes (epoxidation)                          | 10        |
| [Et <sub>4</sub> N] <sub>2</sub> [Fe <sup>III</sup> (Cl)(bTAML)] and [Et <sub>4</sub> N] <sub>2</sub> [Fe <sup>III</sup> (Cl)(NO <sub>2</sub> -bTAML)] | O <sub>2</sub> | Fe <sup>V</sup> (O)             | Autocatalyzed             | Unactivated C-H bonds of alkanes               | this work |

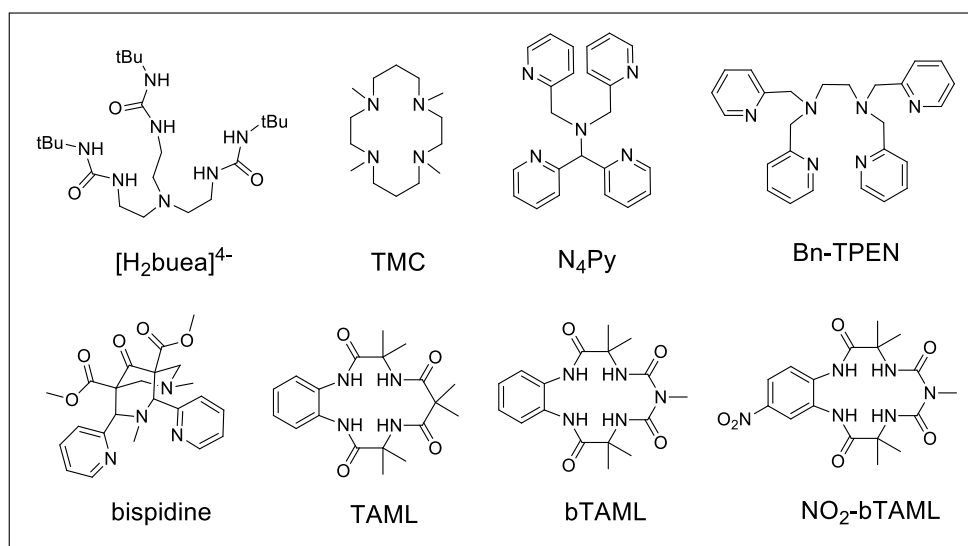

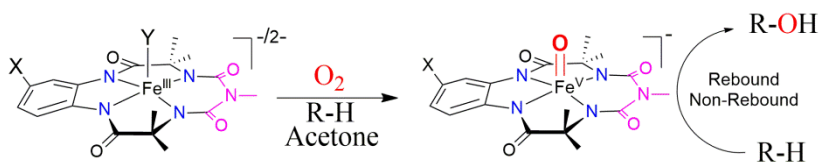

R-H = Alkane substrates having C-H bonds  
 X = -H (**1a/1b**), -NO<sub>2</sub> (**1c**) and Y = Cl (**1a/1c**) or H<sub>2</sub>O (**1b**)

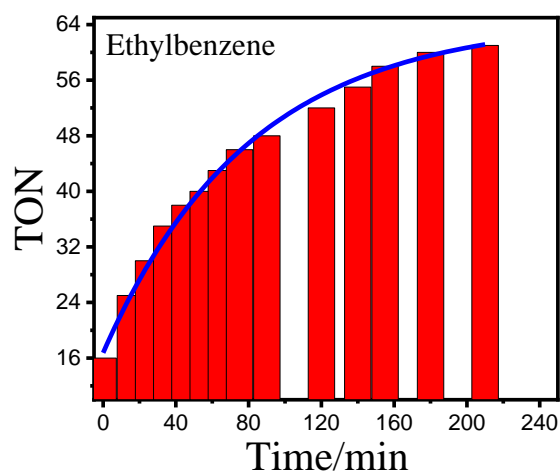

**Fig. S1.** TON vs time plot for the oxygenation of ethylbenzene (0.1 M) with **1a** (0.1 mM) in aerated acetone solvent for initial 4 h.

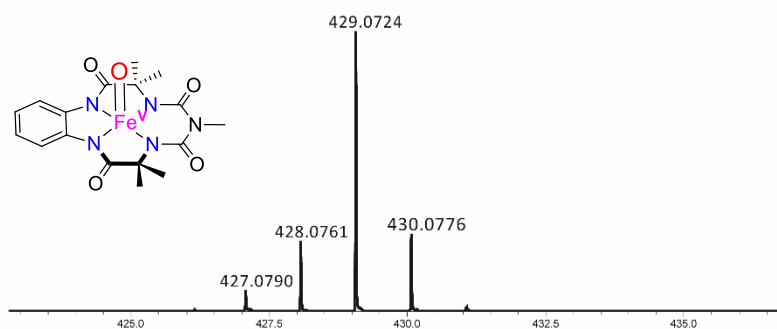

**Fig. S2.** HRMS spectrum of [Fe<sup>V</sup>(O)(bTAML)]<sup>-</sup> generated from **1a** in aerated acetone in presence of diphenylmethane (0.1 M) at RT. The peak at  $m/z = 429.0724$  corresponds to [Fe<sup>V</sup>(O)(bTAML)]<sup>-</sup> (calculated  $m/z = 429.0730$ ).

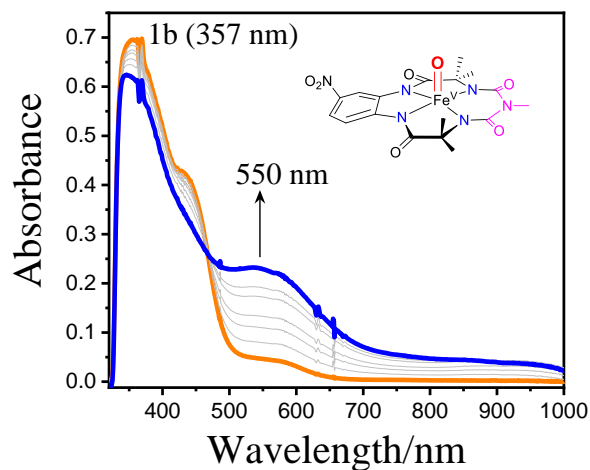

**Fig. S3.** UV-visible spectral changes observed for the formation of  $\text{Fe}^{\text{V}}(\text{O})$  in the reaction of  $[\text{Et}_4\text{N}][(\text{NO}_2\text{-bTAML})\text{Fe}^{\text{III}}\text{-Cl}]$  (0.10 mM) with adamantane (0.1 M) in aerated acetone solvent at room temperature.

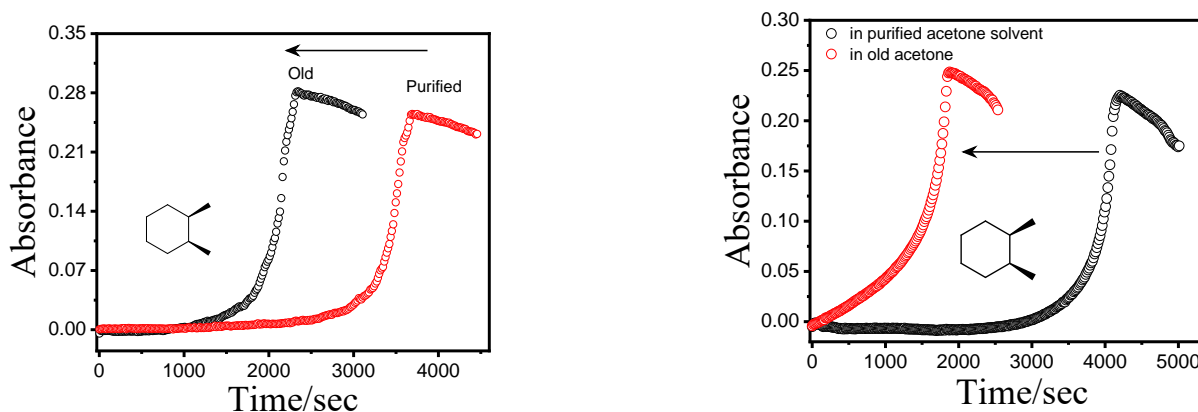

**Fig. S4.** UV-Vis time profiles at 613 nm for the formation of  $\text{Fe}^{\text{V}}(\text{O})$  in the reaction of **(a) 1a** (0.1 mM) with cis-dimethylcyclohexane (0.1 M) ((bottle grade and purified) and **(b) 1a** (0.1 mM) and cis-dimethylcyclohexane (0.1 M) in aerated acetone (bottle grade and purified) at RT. The substrate and solvent are rigorously purified by passing through alumina, silica,  $\text{MgSO}_4$  and distillation process.

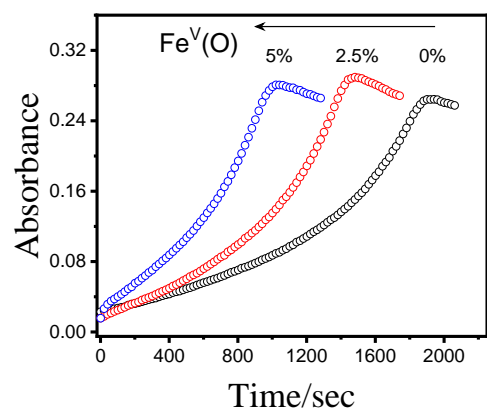

**Fig. S5.** UV-Vis time profiles at 613 nm for the formation of  $\text{Fe}^{\text{V}}(\text{O})$  in the reaction of **1a** (0.1 mM) with ethylbenzene (0.1 M) in presence of  $\text{Fe}^{\text{V}}(\text{O})$  (0-5%). This results in reduction of induction period.

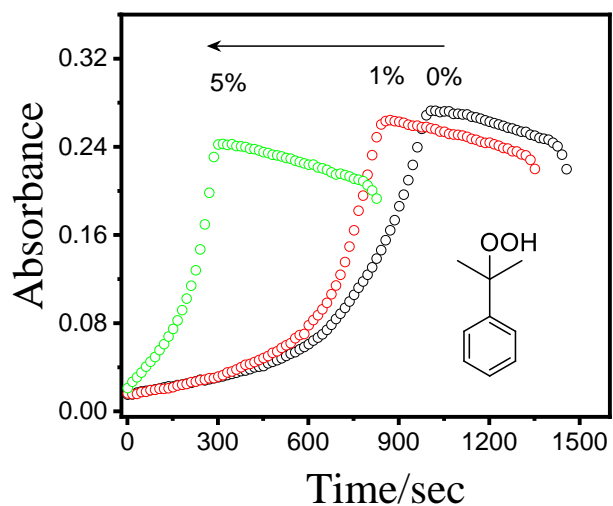

**Fig. S6.** UV-Vis time profiles at 613 nm for the formation of  $\text{Fe}^{\text{V}}(\text{O})$  in the reaction of **1a** (0.1 mM) and diphenylmethane as substrate (0.1 M) in the presence of cumylhydroperoxide (0 to 5%).

5%) in aerated acetone at RT. This results in reduction of induction period with increasing cumylhydroperoxide.

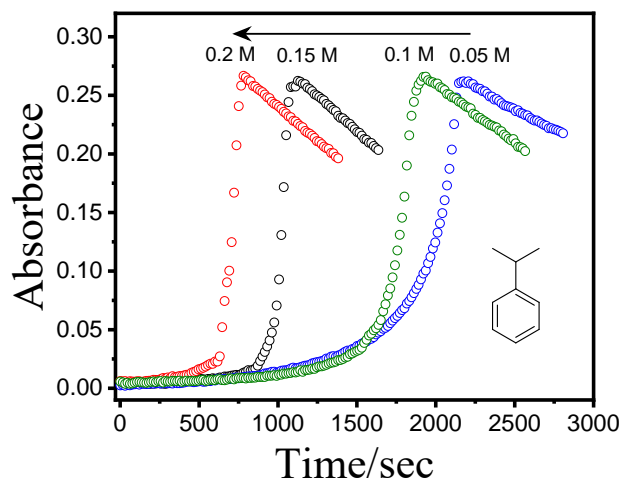

**Fig. S7.** UV-Vis time profiles at 613 nm for the formation of  $\text{Fe}^{\text{V}}(\text{O})$  in the reaction of **1a** (0.1 mM) with increasing amount of substrate (cumene) (0.05M - 0.2 M) in aerated acetone at RT. This also results in reduction of induction period with increasing substrate concentration.

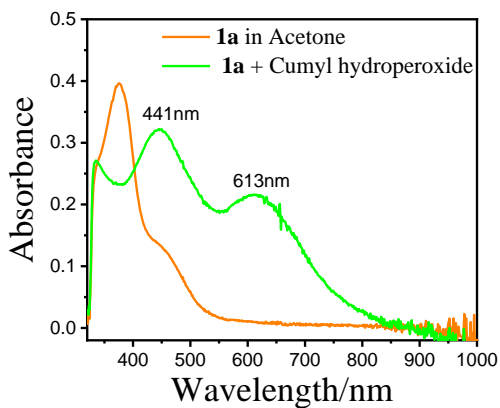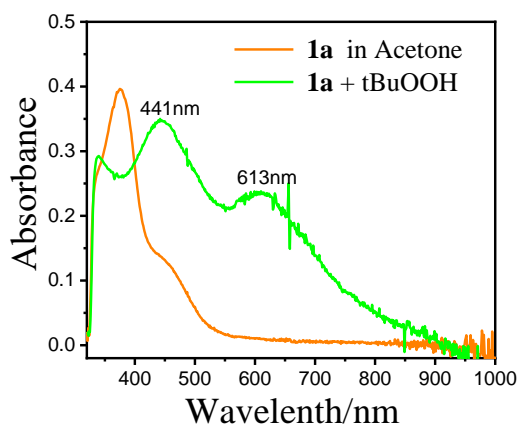

**Fig. S8.** UV-visible spectra for the formation of  $\text{Fe}^{\text{V}}(\text{O})$  in the reaction of  $[\text{Et}_4\text{N}]_2[(\text{bTAML})\text{Fe}^{\text{III}}\text{-Cl}]$  (**1a**) (0.10 mM) with cumyl hydroperoxide and t-butylhydroperoxide (0.15 mM) in aerated acetone solvent at room temperature.

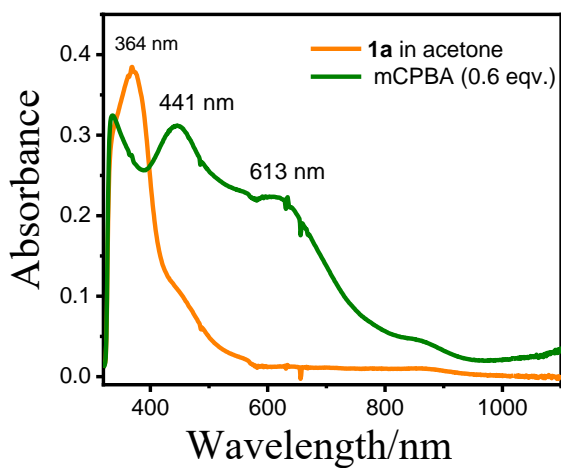

**Fig. S9.** UV-visible spectra for the formation of  $\text{Fe}^{\text{V}}(\text{O})$  from **1a** and mCPBA (0.6 eqv.) in aerated acetone solvent (regular HPLC grade) at room temperature. Interestingly, in regular HPLC grade acetone,  $\text{Fe}^{\text{V}}(\text{O})$  forms quickly without the formation of dimer species (**2**)

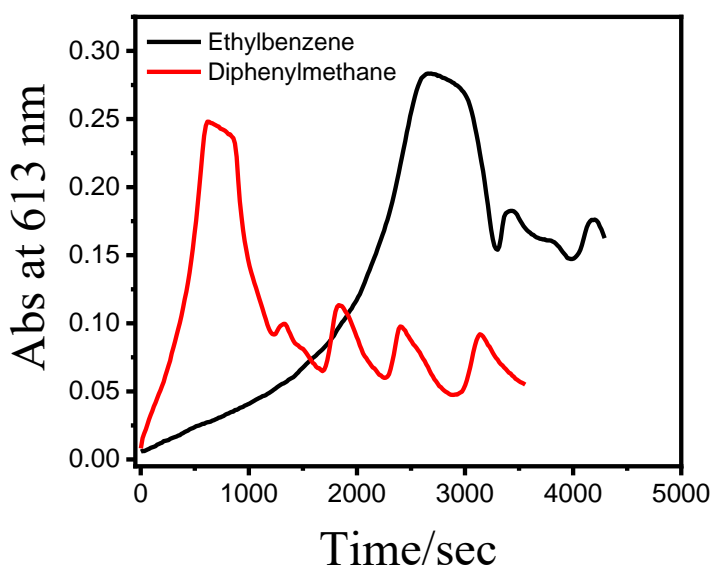



**Fig. S10.** UV-Vis time profiles at 613 nm for the formation of  $\text{Fe}^{\text{V}}(\text{O})$  in the reaction of **1a** (0.1 mM) with diphenylmethane and ethylbenzene (0.1 M) in aerated acetone at RT.

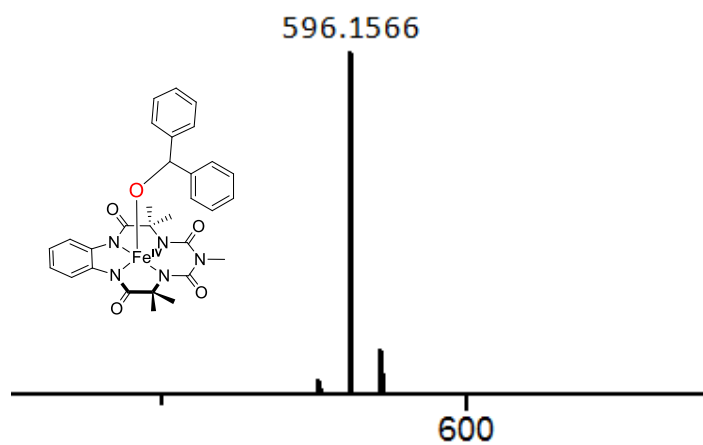

**Fig. S11.** ESI-MS spectrum of  $[(\text{bTAML})\text{Fe}^{\text{IV}}\text{-OR}]^-$  in the reaction of **1a** (0.1 mM) with diphenylmethane (RH) (0.1 M) in aerated acetone at RT. For  $[(\text{bTAML})\text{Fe}^{\text{IV}}\text{-OR}]^-$ , the peak at  $m/z$  596.1566 (the calculated peak at  $m/z$  596.1596) obtained.

**(S12) GC-MS trace for the oxygenation reaction of adamantane by O<sub>2</sub>**

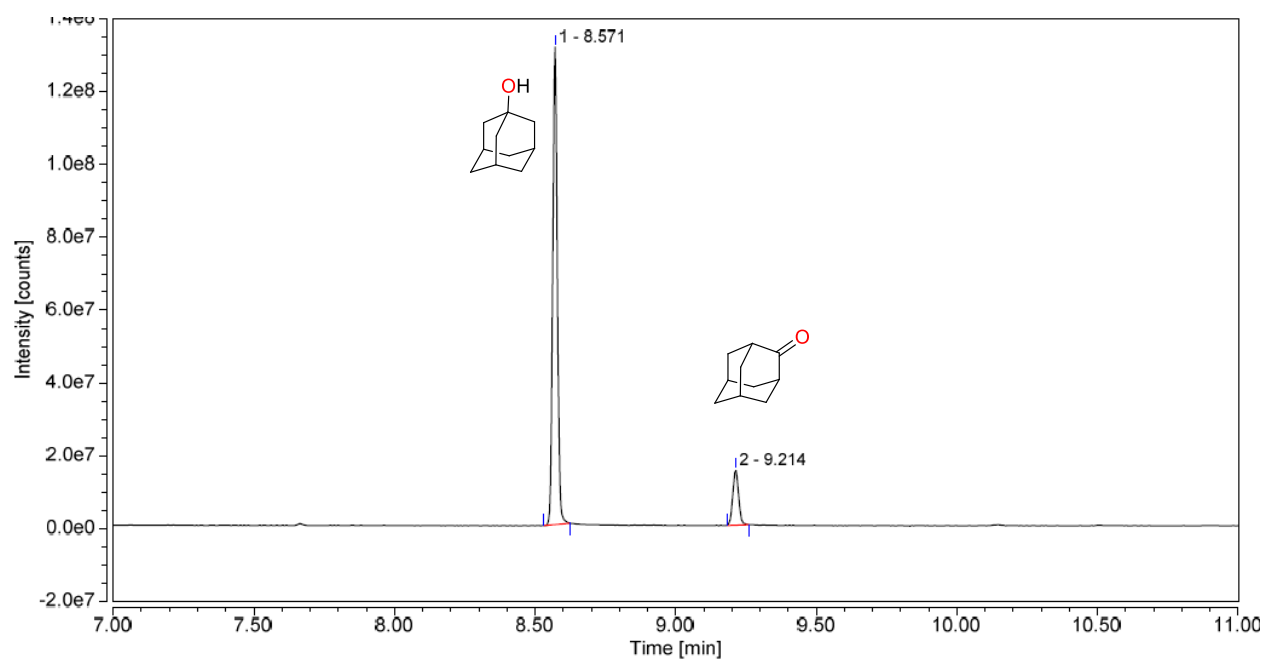

**(S13) GC-MS trace for the oxygenation reaction of cis-1,2-dimethylcyclohexane by O<sub>2</sub>**

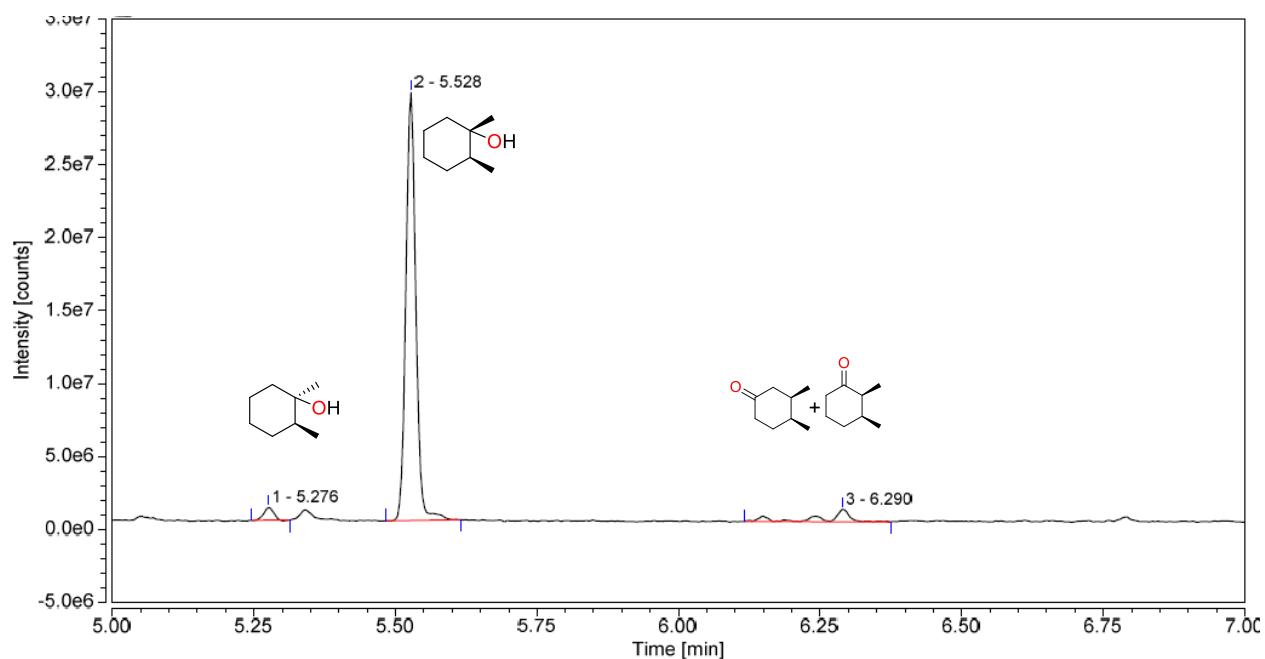

**(S14) GC-MS trace for the oxygenation reaction of trans-1,2-dimethylcyclohexane by O<sub>2</sub>**

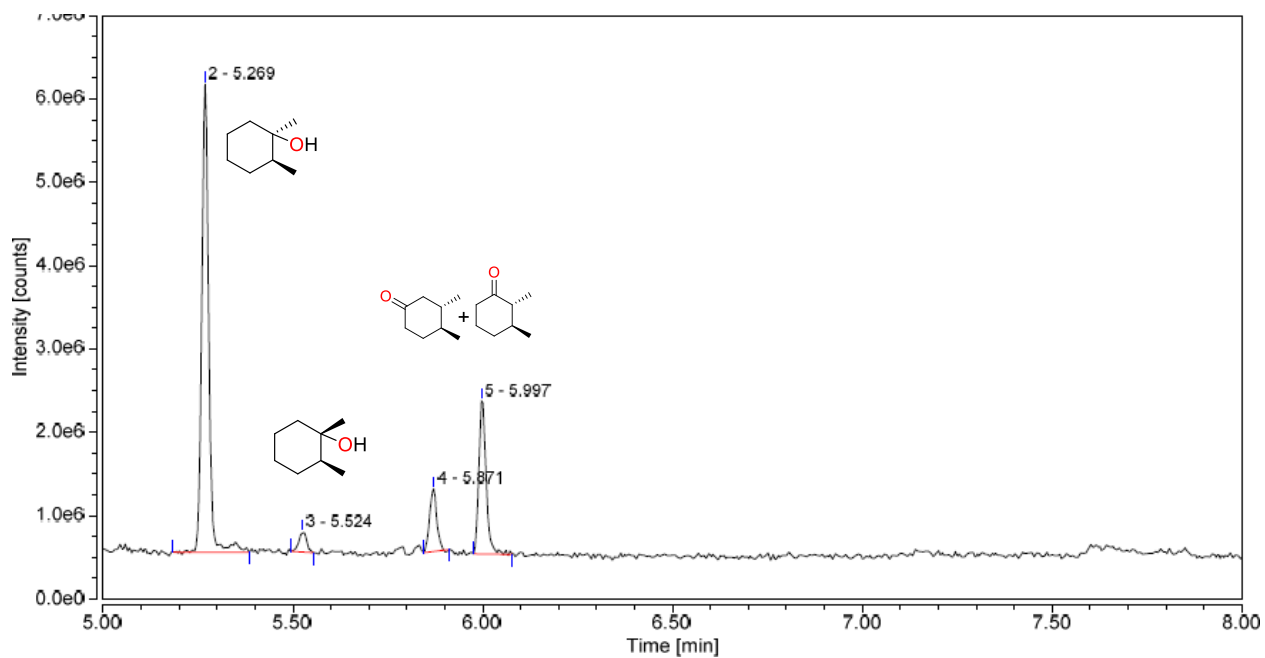

**(S15) GC-MS trace for the oxygenation reaction of cis-decalin by O<sub>2</sub>**

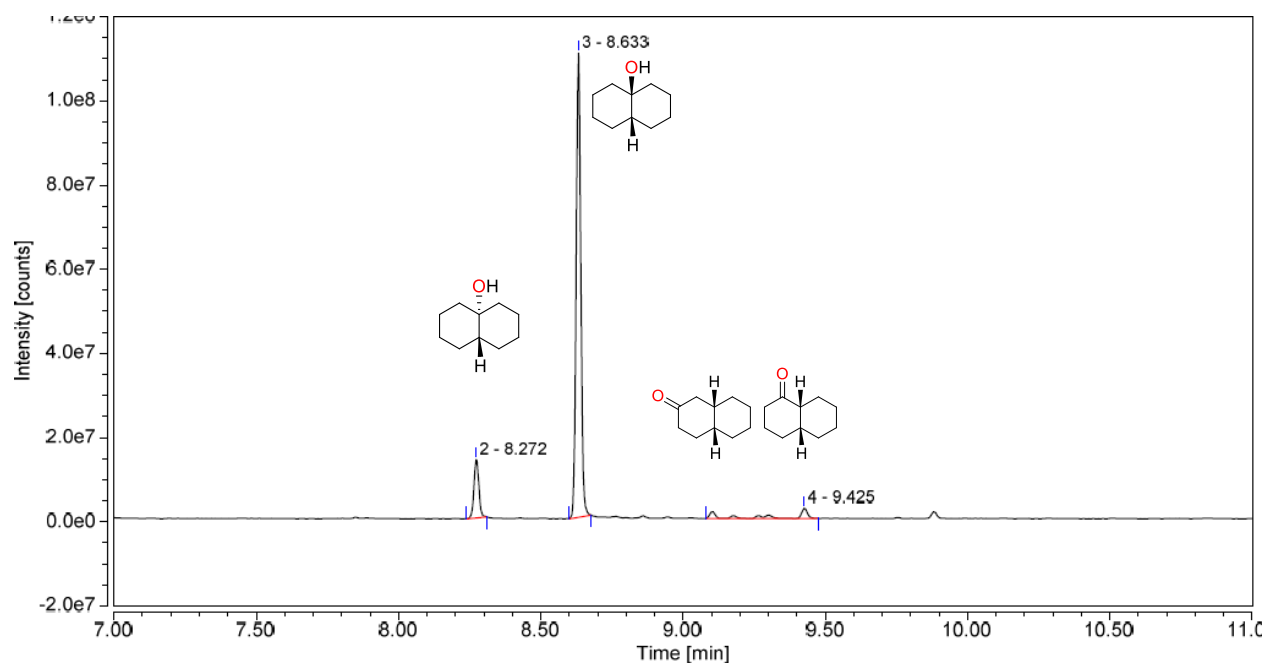

**(S16)** GC-MS trace for the oxygenation reaction of cedryl acetate by  $O_2$

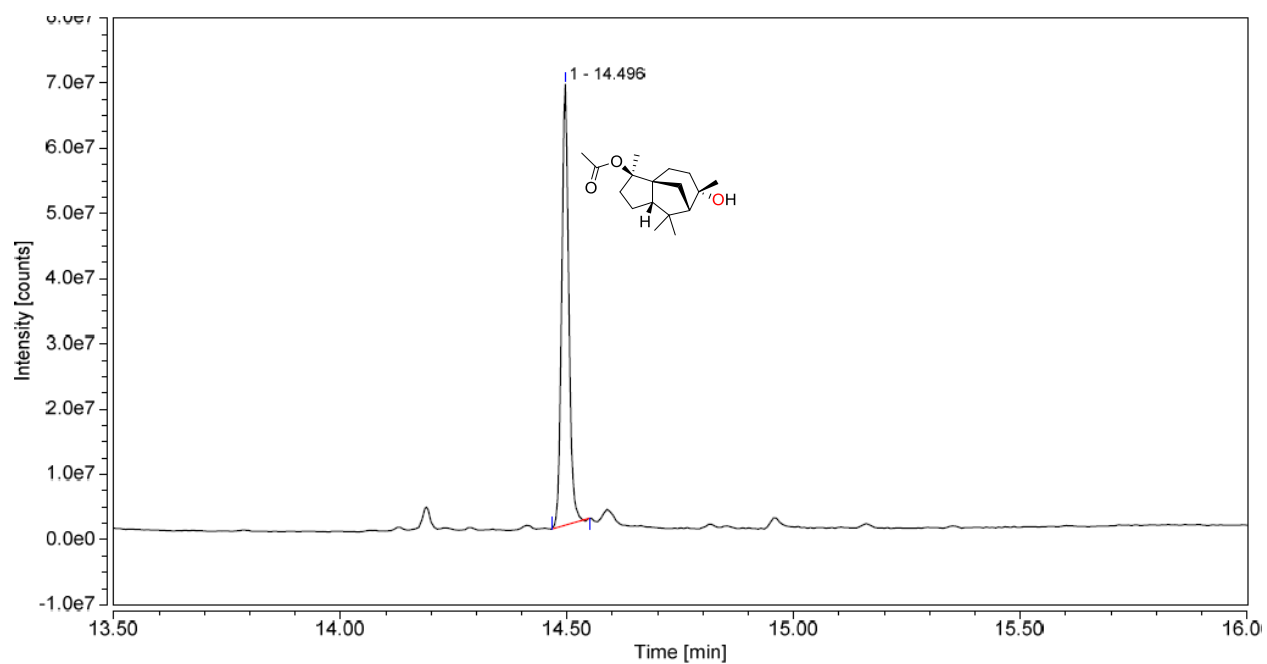

**(S17)** GC-MS trace for the oxygenation reaction of cumene by  $O_2$

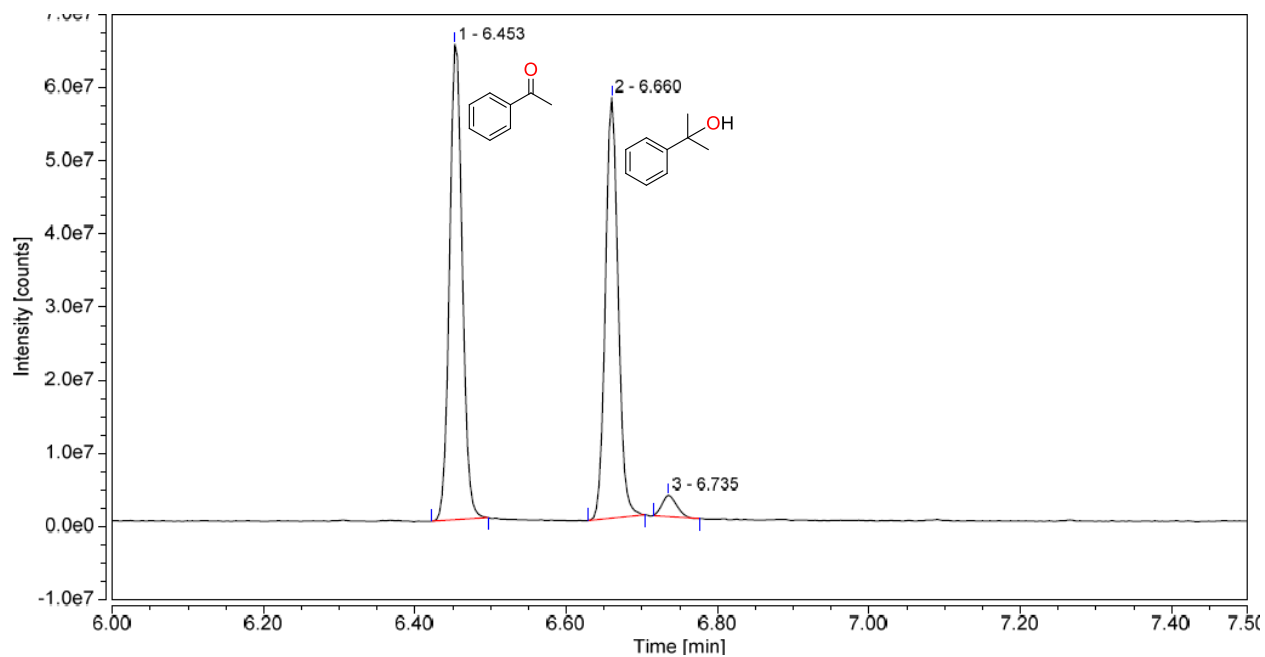

**(S18) GC-MS trace for the oxygenation reaction of diphenylmethane by  $O_2$**

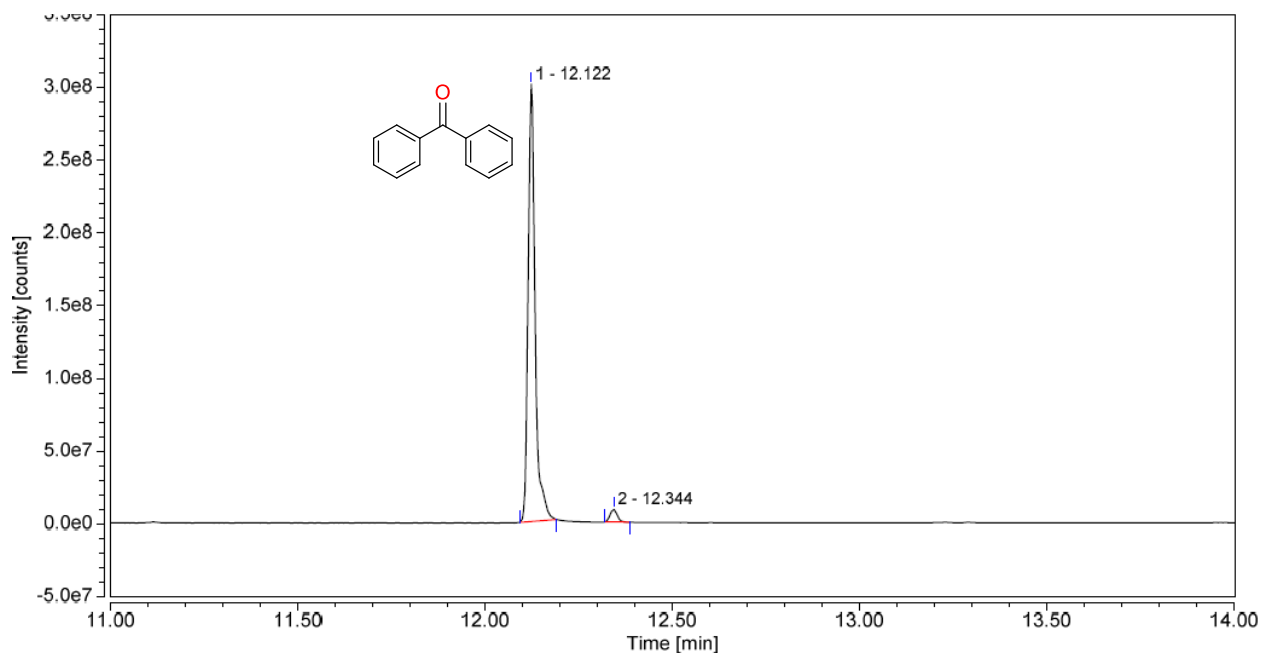

**(S19) GC-MS trace for the oxygenation reaction of ethylbenzene by  $O_2$**

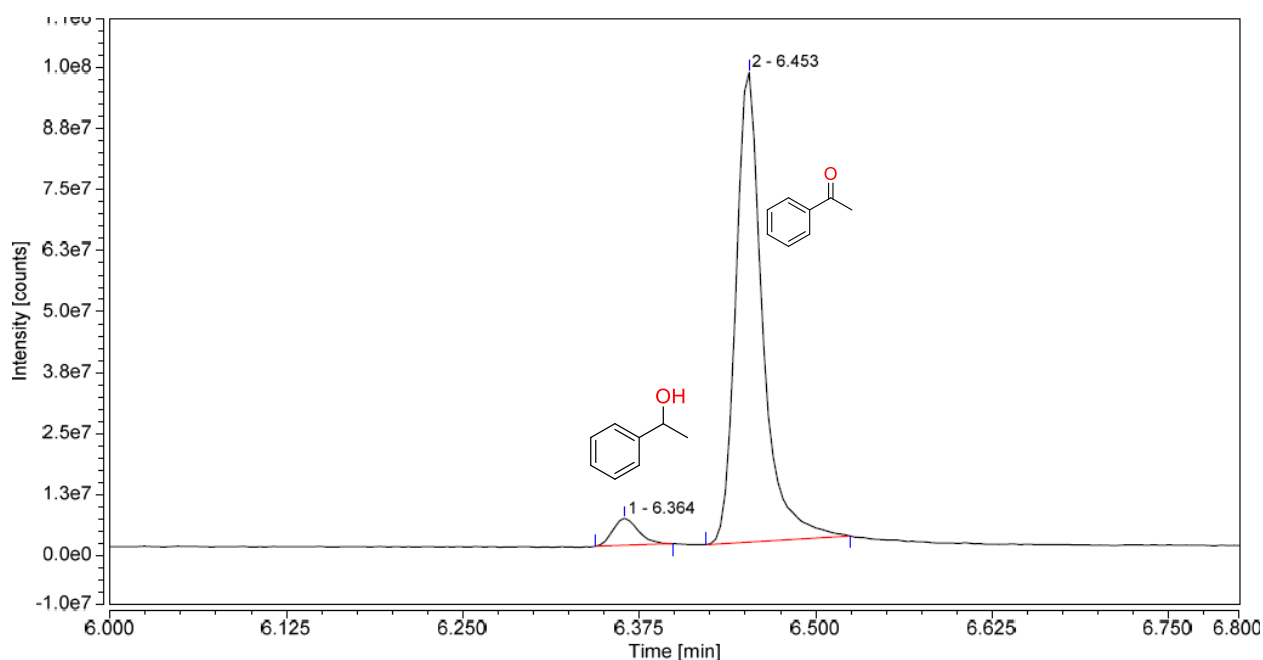

## References

- 1 C. Panda, M. Ghosh, T. Panda, R. Banerjee and S. Sen Gupta, *Chem. Commun.*, 2011, **47**, 8016–8018.
- 2 C. Panda, J. Debgupta, D. Díaz Díaz, K. K. Singh, S. Sen Gupta and B. B. Dhar, *J. Am. Chem. Soc.*, 2014, **136**, 12273–12282.
- 3 W. L. F. Armarego, *Purif. Lab. Chem.*, 2017, 1–1176.
- 4 C. E. MacBeth, A. P. Golombek, J. Young, C. Yang, K. Kuczera, M. P. Hendrich and A. S. Borovik, *Science*, 2000, **289**, 938–941.
- 5 S. O. Kim, C. V. Sastri, M. S. Seo, J. Kim and W. Nam, *J. Am. Chem. Soc.*, 2005, **127**, 4178–4179.
- 6 S. Hong, Y. M. Lee, W. Shin, S. Fukuzumi and W. Nam, *J. Am. Chem. Soc.*, 2009, **131**, 13910–13911.
- 7 P. Comba, Y. M. Lee, W. Nam and A. Waleska, *Chem. Commun.*, 2014, **50**, 412–414.
- 8 A. Ghosh, F. T. De Oliveira, T. Yano, T. Nishioka, E. S. Beach, I. Kinoshita, E. Münck, A. D. Ryabov, C. P. Horwitz and T. J. Collins, *J. Am. Chem. Soc.*, 2005, **127**, 2505–2513.
- 9 M. Sankaralingam, Y. M. Lee, W. Nam and S. Fukuzumi, *Inorg. Chem.*, 2017, **56**, 5096–5104.
- 10 K. K. Singh and S. Sen Gupta, *Chem. Commun.*, 2017, **53**, 5914–5917.
